# Supplementary material for: Probing the structure of giant fullerenes by high resolution trapped ion mobility spectrometry
Source: Royal Society of Chemistry journal article supplement (doi:10.1039/c9cp03326b), 2019-01-01
Supplement: c9cp03326b1.pdf [file c9cp03326b1.pdf]

## Supplementary Information

### Probing the structure of giant fullerenes by high resolution trapped ion mobility spectrometry

Patrick Weis<sup>2</sup>, Frank Hennrich<sup>1</sup>, Regina Fischer<sup>1</sup>, Erik K. Schneider<sup>2</sup>, Marco Neumaier<sup>1</sup>, and Manfred M. Kappes<sup>1,2</sup>

<sup>1</sup>Institute of Nanotechnology, Karlsruhe Institute of Technology (KIT), P.O. Box 3640, 76021 Karlsruhe, Germany

<sup>2</sup>Institute of Physical Chemistry, Karlsruhe Institute of Technology (KIT), P.O. Box 6980, 76049 Karlsruhe, Germany

#### Abstract

We present high-resolution trapped ion mobility spectrometry (TIMS) measurements for fullerene ions in molecular nitrogen. Three different charge states were studied (monocations, monoanions and dianions) with fullerenes ranging in size from C<sub>60</sub> to C<sub>150</sub>. Ions were prepared by either electrospray ionization (ESI, for mono- and dianions) or by atmospheric pressure chemical ionization (APCI, for monocations) of a preformed fullerene soot extract solution. We demonstrate that TIMS allows to identify (and separate) constituent isomers in favorable cases. Using DFT calculations based on known condensed phase structures and trajectory method (TM) calculations we can reproduce the experimental <sup>TIMS</sup>CCS<sub>N<sub>2</sub></sub> for fullerenes up to C<sub>108</sub> to within 0.5%. Using candidate structures based on quantum chemical predictions, we have also obtained structural information for fullerenes C<sub>110</sub>-C<sub>150</sub> - a size range not previously accessed in condensed phase studies. We find that soluble fullerenes in this size have near-spherical rather than tubular structures. While the TM programs presently available for CCS modelling do a remarkably good job at describing the ion mobility of high (and even giant) fullerenes we observe a slight but systematic size-dependent deviation between <sup>TIMS</sup>CCS<sub>N<sub>2</sub></sub> values and our best computational fits which may reflect systematic bonding changes as the cage size increases.

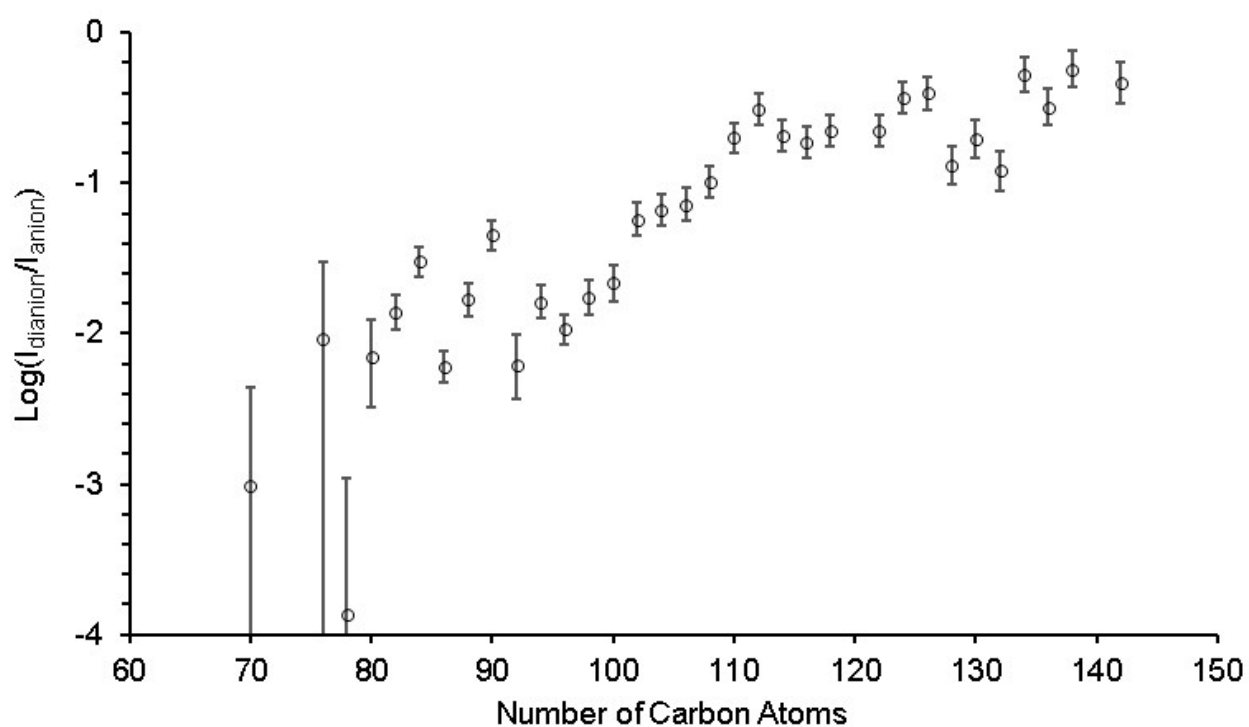

Figure SI 1: Ratio of fullerene dianion and monoanion signal intensities as function of the carbon atom count. Note the logarithmic scale: the relative dianion intensity increases dramatically with size by more than two orders of magnitude from C<sub>70</sub> to C<sub>140</sub>.

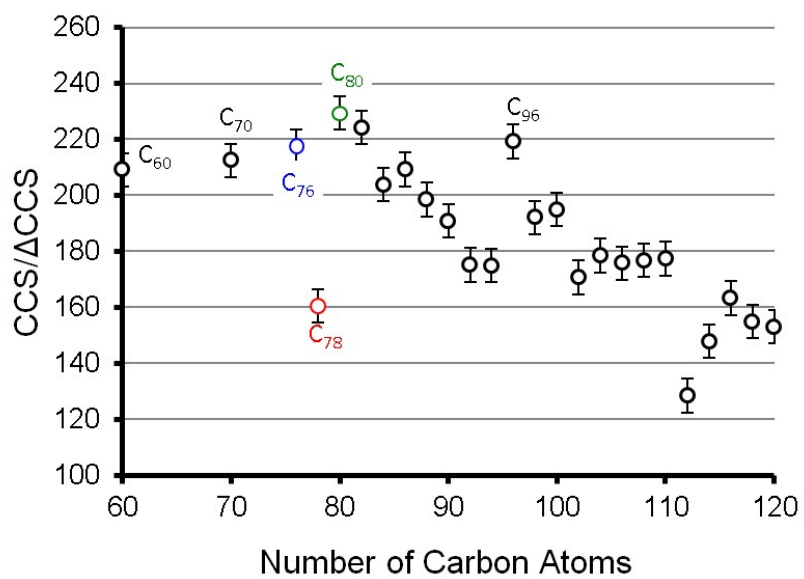

Figure S2: TIMS peak widths (measured as  $CCS/\Delta CCS$  based on a Gaussian fit) for fullerene monoanions as obtained in a typical run. Scan parameters: ramp duration 500 ms, width 0.05 ( $1/K_0$ ).

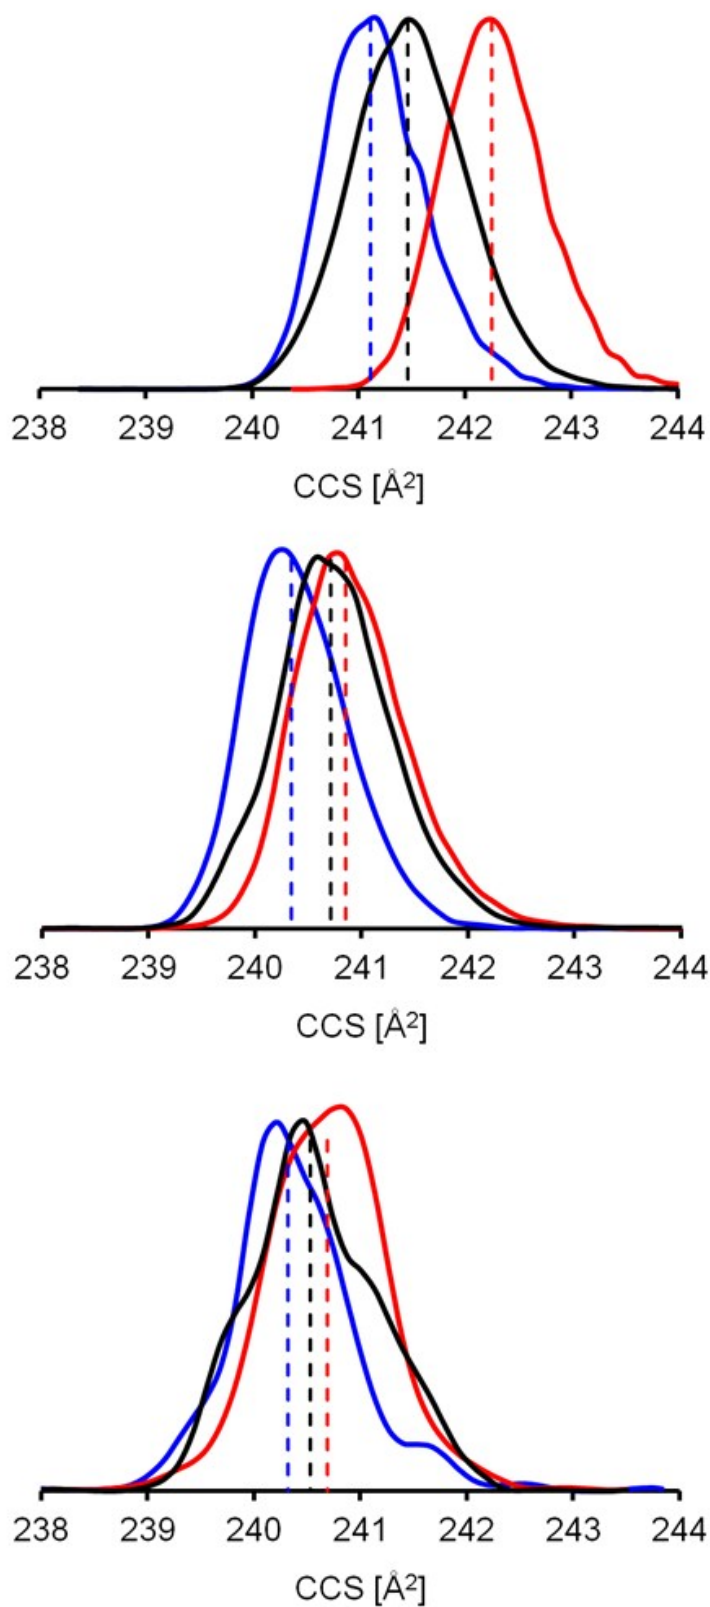

Figure S3: Typical mobilograms of HPLC selected C<sub>78</sub>-isomers (D<sub>3</sub> red and C<sub>2v</sub> blue) and the isomer mixture present in our soot extract (black), recorded on three different days.

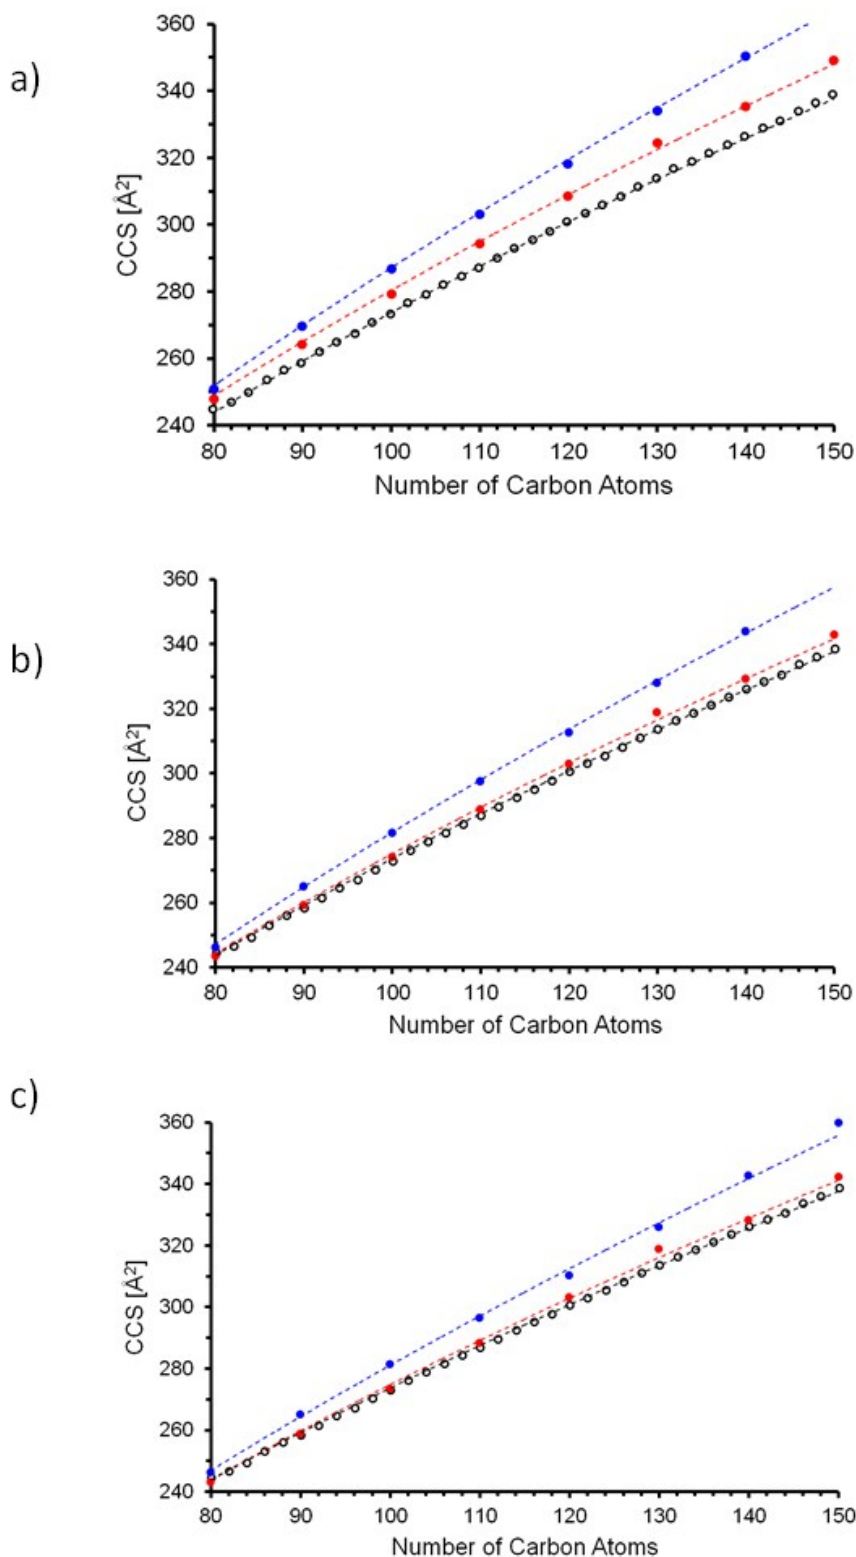

Figure S4: Comparison of calculated and measured CCS values for fullerene (mono)anions. Open circles correspond to the experimental  $\text{TIMS CCS}_{\text{N}_2}$  data. CCS values calculated for tubular model structures are shown as solid blue circles. Spherical model structures are represented as red circles. The dotted lines are fits to the respective data sets and serve as a guide to the eye only. a) using method 1 (cf. table 2), b) method 5 (=method 1 with a scaling factor of 0.9815), c) method 4

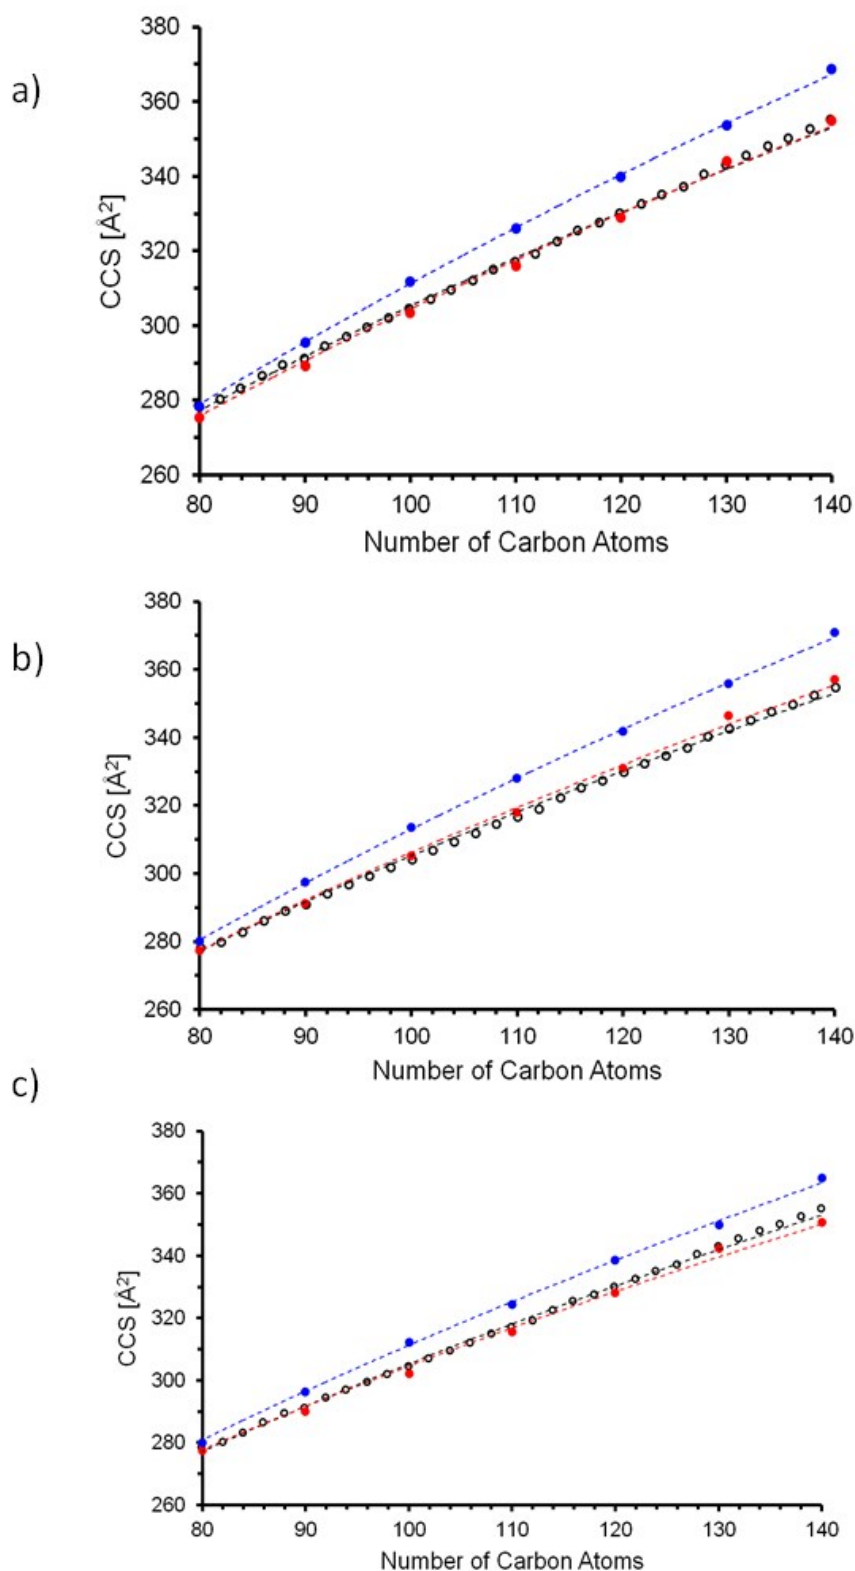

Figure S5: Comparison of calculated and measured CCS values for fullerene dianions. Open circles correspond to the experimental  $\text{TIMS CCS}_{\text{N}_2}$  data. CCS values calculated for tubular model structures are shown as solid blue circles. Spherical model structures are represented as red circles. The dotted lines are fits to the respective data sets and serve as a guide to the eye only. a) using method 1 (cf. table 2), b) method 5 (=method 1 with a scaling factor of 1.0057, c) method 4

| "tubes"              |       |       |       | "spheres"                 |       |       |       |
|----------------------|-------|-------|-------|---------------------------|-------|-------|-------|
| C <sub>80</sub> (1)  | 1.000 | 1.000 | 0.747 | C <sub>80</sub> (7)       | 1.000 | 0.999 | 0.988 |
| C <sub>90</sub> (1)  | 1.000 | 1.000 | 0.651 | C <sub>90</sub> (45)      | 1.000 | 0.909 | 0.887 |
| C <sub>100</sub> (1) | 1.000 | 1.000 | 0.566 | C <sub>100</sub> (449)    | 1.000 | 0.929 | 0.899 |
| C <sub>110</sub> (1) | 1.000 | 1.000 | 0.499 | C <sub>110</sub> (2331)   | 1.000 | 0.978 | 0.948 |
| C <sub>120</sub> (1) | 1.000 | 1.000 | 0.442 | C <sub>120</sub> (10774)  | 1.000 | 0.967 | 0.967 |
| C <sub>130</sub> (1) | 1.000 | 1.000 | 0.391 | C <sub>130</sub> (39175)  | 1.000 | 0.977 | 0.964 |
| C <sub>140</sub> (1) | 1.000 | 1.000 | 0.350 | C <sub>140</sub> (121354) | 1.000 | 1.000 | 0.999 |
| C <sub>150</sub> (1) | 1.000 | 1.000 | 0.314 | C <sub>150</sub> (335569) | 1.000 | 0.997 | 0.934 |

Table S1: Geometry parameters (main axes of inertia tensor, normalized to its largest component, based on the optimized anion geometry) of the most spherical and most tube-like fullerenes as discussed in the main text.

|                               | Method 1                                                                                                                       |          | Method 2                                                                                                                    |               | Method 3                                                                                                                         |               | Method 4                                                                                                                          |          | Method 5                                                                                                         |               | Method 6                                                                |               | Method 7                                                                                                    |               | Method 8                                                                                              |               |                                                                    |
|-------------------------------|--------------------------------------------------------------------------------------------------------------------------------|----------|-----------------------------------------------------------------------------------------------------------------------------|---------------|----------------------------------------------------------------------------------------------------------------------------------|---------------|-----------------------------------------------------------------------------------------------------------------------------------|----------|------------------------------------------------------------------------------------------------------------------|---------------|-------------------------------------------------------------------------|---------------|-------------------------------------------------------------------------------------------------------------|---------------|-------------------------------------------------------------------------------------------------------|---------------|--------------------------------------------------------------------|
|                               | IMoS, Mullik.<br>w/o ion quad.<br>$\alpha_{N_2}=1.74 \text{ \AA}^3$<br>$\rho=3.5 \text{ \AA}$ ,<br>$\epsilon=4.65 \text{ meV}$ |          | IMoS, Mullik.<br>w/o ion quad.<br>$\alpha_{N_2}=0 \text{ \AA}^3$<br>$\rho=3.5 \text{ \AA}$ ,<br>$\epsilon=4.65 \text{ meV}$ |               | IMoS, Mullik.<br>with ion quad.<br>$\alpha_{N_2}=1.74 \text{ \AA}^3$<br>$\rho=3.22 \text{ \AA}$ ,<br>$\epsilon=3.57 \text{ meV}$ |               | IMoS, Mullik.<br>with ion quad.<br>$\alpha_{N_2}=2.00 \text{ \AA}^3$<br>$\rho=3.145 \text{ \AA}$ ,<br>$\epsilon=3.57 \text{ meV}$ |          | method 1 with<br>charge-dependent<br>scaling factors:<br>anions: 0.9815,<br>cations: 0.9743,<br>dianions: 1.0057 |               | same as<br>method 1,<br>except NBO<br>charges<br>instead of<br>Mulliken |               | Collidoscope<br>with default<br>parameters, i.e.<br>$\rho=3.797 \text{ \AA}$<br>$\epsilon=3.17 \text{ meV}$ |               | Mobcal with<br>default<br>parameters, i.e.<br>$\rho=3.581 \text{ \AA}$<br>$\epsilon=4.23 \text{ meV}$ |               | exp                                                                |
|                               | CCS<br>[ $\text{\AA}^2$ ]                                                                                                      | X<br>[%] | CCS<br>[ $\text{\AA}^2$ ]                                                                                                   | $\chi$<br>[%] | CCS<br>[ $\text{\AA}^2$ ]                                                                                                        | $\chi$<br>[%] | CCS<br>[ $\text{\AA}^2$ ]                                                                                                         | X<br>[%] | CCS<br>[ $\text{\AA}^2$ ]                                                                                        | $\chi$<br>[%] | CCS<br>[ $\text{\AA}^2$ ]                                               | $\chi$<br>[%] | CCS<br>[ $\text{\AA}^2$ ]                                                                                   | $\chi$<br>[%] | CCS<br>[ $\text{\AA}^2$ ]                                                                             | $\chi$<br>[%] | <sup>TIMS</sup> CCS <sub>N<sub>2</sub></sub><br>[ $\text{\AA}^2$ ] |
| C <sub>60</sub> <sup>-</sup>  | 214.8                                                                                                                          | 1.4      | 203.9                                                                                                                       | -3.7          | 216.1                                                                                                                            | 2.0           | 210.9                                                                                                                             | -0.4     | 210.8                                                                                                            | -0.5          | 214.8                                                                   | 1.4           | 208.5                                                                                                       | -1.6          | 210.6                                                                                                 | -0.6          | 211.8                                                              |
| C <sub>70</sub> <sup>-</sup>  | 232.0                                                                                                                          | 1.9      | 222.3                                                                                                                       | -2.4          | 233.0                                                                                                                            | 2.3           | 227.0                                                                                                                             | -0.3     | 227.7                                                                                                            | 0.0           | 232.0                                                                   | 1.9           | 228.9                                                                                                       | 0.5           | 227.4                                                                                                 | -0.1          | 227.7                                                              |
| C <sub>76</sub> <sup>-</sup>  | 242.3                                                                                                                          | 1.8      | 233.5                                                                                                                       | -1.9          | 244.0                                                                                                                            | 2.5           | 237.9                                                                                                                             | -0.1     | 237.8                                                                                                            | -0.1          | 242.5                                                                   | 1.9           | 239.6                                                                                                       | 0.7           | 238.0                                                                                                 | 0.0           | 238.1                                                              |
| C <sub>84</sub> <sup>-</sup>  | 254.1                                                                                                                          | 1.9      | 245.7                                                                                                                       | -1.5          | 255.4                                                                                                                            | 2.4           | 249.1                                                                                                                             | -0.1     | 249.4                                                                                                            | 0.0           | 254.2                                                                   | 1.9           | 253.5                                                                                                       | 1.7           | 249.0                                                                                                 | -0.2          | 249.4                                                              |
| C <sub>96</sub> <sup>-</sup>  | 273.9                                                                                                                          | 2.5      | 266.5                                                                                                                       | -0.2          | 274.7                                                                                                                            | 2.8           | 267.5                                                                                                                             | 0.1      | 268.8                                                                                                            | 0.6           | 274.1                                                                   | 2.6           | 272.5                                                                                                       | 2.0           | 268.8                                                                                                 | 0.6           | 267.2                                                              |
|                               |                                                                                                                                |          |                                                                                                                             |               |                                                                                                                                  |               |                                                                                                                                   |          |                                                                                                                  |               |                                                                         |               |                                                                                                             |               |                                                                                                       |               |                                                                    |
| C <sub>70</sub> <sup>2-</sup> | 261.8                                                                                                                          | -0.5     | 222.5                                                                                                                       | -15.4         | 265.3                                                                                                                            | 0.9           | 265.0                                                                                                                             | 0.7      | 263.3                                                                                                            | 0.1           | 261.9                                                                   | -0.5          | 259.8                                                                                                       | -1.2          | 256.0                                                                                                 | -2.7          | 263.1                                                              |
| C <sub>76</sub> <sup>2-</sup> | 270.7                                                                                                                          | -0.7     | 233.6                                                                                                                       | -14.3         | 274.8                                                                                                                            | 0.8           | 273.9                                                                                                                             | 0.5      | 272.3                                                                                                            | -0.1          | 271.4                                                                   | -0.4          | 268.1                                                                                                       | -1.7          | 264.8                                                                                                 | -2.9          | 272.6                                                              |
| C <sub>84</sub> <sup>2-</sup> | 281.0                                                                                                                          | -0.6     | 245.8                                                                                                                       | -13.1         | 284.4                                                                                                                            | 0.6           | 282.8                                                                                                                             | 0.0      | 282.6                                                                                                            | -0.1          | 281.2                                                                   | -0.6          | 276.3                                                                                                       | -2.3          | 273.9                                                                                                 | -3.2          | 282.8                                                              |
| C <sub>96</sub> <sup>2-</sup> | 297.9                                                                                                                          | -0.5     | 266.6                                                                                                                       | -10.9         | 300.3                                                                                                                            | 0.4           | 297.4                                                                                                                             | -0.6     | 299.6                                                                                                            | 0.1           | 298.4                                                                   | -0.3          | 297.2                                                                                                       | -0.7          | 291.0                                                                                                 | -2.7          | 299.3                                                              |
|                               |                                                                                                                                |          |                                                                                                                             |               |                                                                                                                                  |               |                                                                                                                                   |          |                                                                                                                  |               |                                                                         |               |                                                                                                             |               |                                                                                                       |               |                                                                    |
| C <sub>60</sub> <sup>+</sup>  | 214.6                                                                                                                          | 2.2      | 203.8                                                                                                                       | -2.9          | 215.3                                                                                                                            | 2.5           | 210.1                                                                                                                             | 0.1      | 209.1                                                                                                            | -0.4          | 214.6                                                                   | 2.2           | 208.5                                                                                                       | -0.7          | 213.4                                                                                                 | 1.6           | 210.0                                                              |
| C <sub>70</sub> <sup>+</sup>  | 231.9                                                                                                                          | 2.4      | 222.1                                                                                                                       | -2.0          | 233.1                                                                                                                            | 2.9           | 227.0                                                                                                                             | 0.2      | 226.0                                                                                                            | -0.3          | 231.9                                                                   | 2.3           | 228.9                                                                                                       | 1.0           | 230.6                                                                                                 | 1.7           | 226.6                                                              |
| C <sub>76</sub> <sup>+</sup>  | 242.4                                                                                                                          | 2.6      | 233.3                                                                                                                       | -1.2          | 243.5                                                                                                                            | 3.1           | 237.4                                                                                                                             | 0.5      | 236.2                                                                                                            | 0.0           | 242.1                                                                   | 2.5           | 239.8                                                                                                       | 1.5           | 241.5                                                                                                 | 2.2           | 236.2                                                              |
| C <sub>84</sub> <sup>+</sup>  | 254.2                                                                                                                          | 2.6      | 245.6                                                                                                                       | -0.9          | 254.5                                                                                                                            | 2.7           | 248.3                                                                                                                             | 0.2      | 247.7                                                                                                            | -0.1          | 254.0                                                                   | 2.5           | 253.8                                                                                                       | 2.4           | 251.7                                                                                                 | 1.6           | 247.9                                                              |
| C <sub>96</sub> <sup>+</sup>  | 274.4                                                                                                                          | 3.2      | 266.3                                                                                                                       | 0.1           | 275.1                                                                                                                            | 3.4           | 267.9                                                                                                                             | 0.7      | 267.4                                                                                                            | 0.5           | 273.8                                                                   | 2.9           | 273.5                                                                                                       | 2.8           | 272.4                                                                                                 | 2.4           | 266.0                                                              |
|                               |                                                                                                                                |          |                                                                                                                             |               |                                                                                                                                  |               |                                                                                                                                   |          |                                                                                                                  |               |                                                                         |               |                                                                                                             |               |                                                                                                       |               |                                                                    |
| $\Sigma\chi^2$                | 53.8                                                                                                                           |          | 772.8                                                                                                                       |               | 74.6                                                                                                                             |               | 2.2                                                                                                                               |          | 1.2                                                                                                              |               | 51.6                                                                    |               | 37.5                                                                                                        |               | 52.7                                                                                                  |               |                                                                    |

Table S2: Comparison of experimental and calculated CCS (for C<sub>60</sub>, C<sub>70</sub>, C<sub>76</sub>(1) (D<sub>2</sub>), C<sub>84</sub>(23) (D<sub>2</sub>) and C<sub>96</sub>(183) (D<sub>2</sub>) derived monoanions. This table is an extension of table 2 in the main text: Besides the methods 1-5 discussed therein it contains CCS calculations based on charges determined with the "natural bond analysis" scheme (method 6), as well as calculations with the Collidoscope and Mobcal packages (method 7 and 8).



| C60+ | x         | y         | z         | Mulliken-charges | NBO-charges | ESP-charges |
|------|-----------|-----------|-----------|------------------|-------------|-------------|
| C    | -1.24215  | -1.23E-05 | 3.36689   | 0.0142           | 0.0136      | 0.0169      |
| C    | -0.384313 | -1.18036  | 3.36631   | 0.0153           | 0.0145      | 0.0130      |
| C    | 1.00337   | -0.729556 | 3.36658   | 0.0141           | 0.0142      | 0.0161      |
| C    | 1.00338   | 0.729533  | 3.36658   | 0.0142           | 0.0143      | 0.0160      |
| C    | -0.384309 | 1.18034   | 3.3663    | 0.0152           | 0.0145      | 0.0130      |
| C    | 2.34561   | -2.59794  | 0.602493  | 0.0252           | 0.0234      | 0.0256      |
| C    | 3.19344   | -1.42789  | 0.602616  | 0.0156           | 0.0283      | 0.0280      |
| C    | 2.96907   | -0.701403 | 1.8541    | 0.0164           | 0.0134      | 0.0102      |
| C    | 1.97177   | -1.43274  | 2.62576   | 0.0203           | 0.0075      | 0.0107      |
| C    | 1.58403   | -2.60714  | 1.85335   | 0.0069           | 0.0161      | 0.0133      |
| C    | 3.19344   | 1.42786   | 0.60261   | 0.0156           | 0.0283      | 0.0281      |
| C    | 2.34568   | 2.59799   | 0.602502  | 0.0252           | 0.0234      | 0.0257      |
| C    | 1.58405   | 2.60715   | 1.85337   | 0.0068           | 0.0161      | 0.0131      |
| C    | 1.9718    | 1.43273   | 2.6258    | 0.0203           | 0.0075      | 0.0108      |
| C    | 2.96908   | 0.70138   | 1.8541    | 0.0164           | 0.0133      | 0.0101      |
| C    | -0.371081 | 3.47872   | 0.603967  | 0.0186           | 0.0277      | 0.0301      |
| C    | -1.74668  | 3.03384   | 0.604093  | 0.0148           | 0.0227      | 0.0218      |
| C    | -1.99091  | 2.31326   | 1.85433   | 0.0134           | 0.0152      | 0.0122      |
| C    | -0.753966 | 2.31833   | 2.62567   | 0.0252           | 0.0090      | 0.0129      |
| C    | 0.249735  | 3.04161   | 1.85439   | 0.0150           | 0.0107      | 0.0073      |
| C    | -3.42412  | 0.72297   | 0.605057  | 0.0192           | 0.0250      | 0.0266      |
| C    | -3.42411  | -0.723002 | 0.605056  | 0.0191           | 0.0250      | 0.0265      |
| C    | -2.81693  | -1.17847  | 1.85488   | 0.0152           | 0.0111      | 0.0090      |
| C    | -2.4394   | -1.26E-05 | 2.62649   | 0.0159           | 0.0089      | 0.0105      |
| C    | -2.81695  | 1.17845   | 1.85489   | 0.0152           | 0.0111      | 0.0090      |
| C    | -1.74662  | -3.03376  | 0.604084  | 0.0148           | 0.0227      | 0.0218      |
| C    | -0.371075 | -3.4787   | 0.603961  | 0.0186           | 0.0277      | 0.0302      |
| C    | 0.249733  | -3.04158  | 1.85437   | 0.0150           | 0.0107      | 0.0072      |
| C    | -0.753958 | -2.31831  | 2.62563   | 0.0251           | 0.0090      | 0.0129      |
| C    | -1.99088  | -2.31326  | 1.85432   | 0.0135           | 0.0152      | 0.0122      |
| C    | -0.249724 | -3.04158  | -1.85437  | 0.0148           | 0.0107      | 0.0079      |
| C    | 0.75397   | -2.31836  | -2.62567  | 0.0252           | 0.0090      | 0.0126      |
| C    | 1.99089   | -2.31328  | -1.85433  | 0.0134           | 0.0152      | 0.0130      |
| C    | 1.74662   | -3.0338   | -0.604101 | 0.0147           | 0.0227      | 0.0214      |
| C    | 0.371094  | -3.47884  | -0.60399  | 0.0188           | 0.0277      | 0.0289      |
| C    | 2.81694   | -1.17848  | -1.8549   | 0.0152           | 0.0111      | 0.0082      |
| C    | 2.43943   | -1.21E-05 | -2.62653  | 0.0159           | 0.0089      | 0.0109      |
| C    | 2.81696   | 1.17846   | -1.85491  | 0.0152           | 0.0111      | 0.0083      |
| C    | 3.42417   | 0.722983  | -0.60507  | 0.0192           | 0.0250      | 0.0268      |
| C    | 3.42415   | -0.723009 | -0.605067 | 0.0191           | 0.0250      | 0.0270      |
| C    | 1.99091   | 2.31329   | -1.85434  | 0.0133           | 0.0152      | 0.0129      |
| C    | 0.753977  | 2.31838   | -2.62571  | 0.0253           | 0.0090      | 0.0127      |
| C    | -0.249724 | 3.04161   | -1.85439  | 0.0149           | 0.0107      | 0.0079      |
| C    | 0.371102  | 3.47886   | -0.603995 | 0.0188           | 0.0277      | 0.0290      |
| C    | 1.74668   | 3.03387   | -0.60411  | 0.0148           | 0.0227      | 0.0214      |
| C    | -1.58406  | 2.60714   | -1.85334  | 0.0067           | 0.0161      | 0.0129      |

|   |          |           |           |        |        |        |
|---|----------|-----------|-----------|--------|--------|--------|
| C | -1.97186 | 1.43277   | -2.62585  | 0.0205 | 0.0075 | 0.0112 |
| C | -2.96906 | 0.701382  | -1.85407  | 0.0163 | 0.0133 | 0.0100 |
| C | -3.19345 | 1.42786   | -0.6026   | 0.0155 | 0.0283 | 0.0284 |
| C | -2.34574 | 2.59803   | -0.602501 | 0.0253 | 0.0234 | 0.0251 |
| C | -2.96905 | -0.701407 | -1.85407  | 0.0163 | 0.0134 | 0.0099 |
| C | -1.97183 | -1.43277  | -2.62581  | 0.0205 | 0.0075 | 0.0112 |
| C | -1.58404 | -2.60713  | -1.85333  | 0.0067 | 0.0161 | 0.0129 |
| C | -2.34568 | -2.59799  | -0.60249  | 0.0252 | 0.0234 | 0.0251 |
| C | -3.19346 | -1.4279   | -0.602604 | 0.0156 | 0.0283 | 0.0285 |
| C | -1.00336 | -0.729554 | -3.36648  | 0.0141 | 0.0142 | 0.0158 |
| C | -1.00336 | 0.729531  | -3.36649  | 0.0141 | 0.0142 | 0.0159 |
| C | 0.384312 | 1.18034   | -3.36625  | 0.0152 | 0.0145 | 0.0128 |
| C | 1.24216  | -1.22E-05 | -3.3669   | 0.0143 | 0.0136 | 0.0174 |
| C | 0.384315 | -1.18036  | -3.36626  | 0.0152 | 0.0145 | 0.0129 |

Table S3:  $C_{60}^+$ , DFT-optimized coordinates and partial charges calculated with Mulliken, NBO, and ESP-fit. The partial charge distributions are very similar, the calculated CCS (parameters as used in method 1) are  $214.8 \text{ \AA}^2$  (Mulliken),  $214.8 \text{ \AA}^2$  (NBO),  $214.9 \text{ \AA}^2$  (ESP-Fit)
